# Supplementary material
Source: Royal Society of Chemistry journal article supplement (doi:10.1039/d5fo04853b)
Supplement: d5fo04853b1.pdf [file d5fo04853b1.pdf]

## Supplementary Materials

### CONTENT

|                                                                                                   |   |
|---------------------------------------------------------------------------------------------------|---|
| Table S1 Nutritional Composition of the Meal Replacement Food .....                               | 2 |
| Table S2 Ingredients of Meal Replacement Food .....                                               | 3 |
| Table S3 Changes of Anthropometric and Metabolic Indicators in MRG .....                          | 4 |
| Table S4 Changes of Anthropometric and Metabolic Indicators in DCG.....                           | 4 |
| Table S5 Changes of Anthropometric and Metabolic Indicators in MRG(Adjust the baseline BMI).....  | 5 |
| Table S6 Changes of Anthropometric and Metabolic Indicators in DCG (Adjust the baseline BMI)..... | 5 |
| Table S7 Difference in Anthropometric Indicators Improvement (Adjust the baseline BMI).....       | 6 |
| Table S8 Difference in Metabolic Indicators Improvement (Adjust the baseline BMI).....            | 6 |

Table S1 Nutritional Composition of the Meal Replacement Food

| Item                           | Per 100g             |
|--------------------------------|----------------------|
| Energy, kcal                   | 370                  |
| Protein, g                     | 45                   |
| Fat (non-trans fatty acids), g | 7.5                  |
| Carbohydrates, g               | 21.4                 |
| Dietary Fiber, g               | 17.8                 |
| Sodium, mg                     | 571                  |
| Vitamin A, $\mu\text{g}$       | 250                  |
| Vitamin D, $\mu\text{g}$       | 5.8                  |
| Vitamin E, mg                  | 11.25( $\alpha$ -TE) |
| Vitamin B1, mg                 | 2.75                 |
| Vitamin B2, mg                 | 1.33                 |
| Vitamin B6, mg                 | 1.08                 |
| Vitamin B12, $\mu\text{g}$     | 2.75                 |
| Vitamin C, mg                  | 70.60                |
| Niacin, mg                     | 13.83                |
| Folic Acid, $\mu\text{g}$      | 180                  |
| Pantothenic Acid, mg           | 4.83                 |
| Potassium, mg                  | 288                  |
| Magnesium, mg                  | 227                  |
| Calcium, mg                    | 598                  |
| Iron, mg                       | 8.4                  |
| Zinc, mg                       | 10                   |
| L-Carnitine, g                 | 0.834                |
| Taurine, g                     | 0.375                |

Table S2 Ingredients of Meal Replacement Food

| Category                      | Ingredient Name                                                                                                                                                                                                                            |
|-------------------------------|--------------------------------------------------------------------------------------------------------------------------------------------------------------------------------------------------------------------------------------------|
| Protein                       | Soy Protein Isolate, Skim Milk Powder, Calcium Caseinate, Whey Protein Concentrate, Rice Protein Powder                                                                                                                                    |
| Fat                           | Medium-Chain Triglyceride Microencapsulated Powder, Sunflower Oil Microencapsulated Powder, Flaxseed Oil, Phospholipids                                                                                                                    |
| Vitamins                      | dl- $\alpha$ -Tocopheryl Acetate, Sodium L-Ascorbate, Niacinamide, Calcium D-Pantothenate, Thiamine Hydrochloride, Pyridoxine Hydrochloride, Riboflavin, Vitamin A Acetate, Folic Acid, Cholecalciferol, Cyanocobalamin, $\beta$ -Carotene |
| Minerals                      | Magnesium Carbonate, Zinc Sulfate, Ferric Pyrophosphate, Calcium Carbonate, Edible Salt                                                                                                                                                    |
| Carbohydrates & Dietary Fiber | Maltooligosaccharides, Polydextrose, Maltodextrin, Isomaltooligosaccharides, Fructooligosaccharides, Oat Fiber, Wheat Fiber, Konjac Flour, Psyllium Husk Powder, Resistant Dextrin                                                         |
| Other Additives               | Potato Extract, Malt Extract, Pomegranate Juice Powder, L-Theanine, Epigallocatechin Gallate, Phytosterol Esters, L-Carnitine L-Tartrate, Coconut Cream Powder                                                                             |

Table S3 Changes of Anthropometric and Metabolic Indicators in MRG

| Variables              | 45 days-Baseline    |         | 90 days-Baseline    |         |
|------------------------|---------------------|---------|---------------------|---------|
|                        | Estimate (95%CI)    | P       | Estimate (95%CI)    | P       |
| Weight, kg             | -3.97(-4.74,-3.21)  | <0.001* | -7.68(-8.87,-6.49)  | <0.001* |
| BMI, kg/m <sup>2</sup> | -1.28(-1.57,-0.99)  | <0.001* | -2.59(-3.04,-2.14)  | <0.001* |
| BFP, %                 | -1.51(-1.83,-1.19)  | <0.001* | -3.46(-3.99,-2.92)  | <0.001* |
| SBP, mmHg              | -3.55(-7.27,0.18)   | 0.062   | -6.27(-10.86,-1.69) | 0.008*  |
| DBP, mmHg              | -2.07(-4.8,0.67)    | 0.136   | -3.59(-6.3,-0.88)   | 0.010*  |
| TC, mmol/L             | -0.31(-0.49,-0.13)  | 0.001*  | -0.41(-0.63,-0.2)   | <0.001* |
| TG, mmol/L             | -0.52(-0.84,-0.21)  | 0.001*  | -0.63(-0.99,-0.27)  | 0.001*  |
| FBG, mmol/L            | -0.48(-0.81,-0.14)  | 0.006*  | -0.54(-0.98,-0.11)  | 0.015*  |
| ALT, U/L               | -6.82(-10.71,-2.93) | 0.001*  | -8.31(-13.29,-3.34) | 0.001*  |

\*P<0.05

Table S4 Changes of Anthropometric and Metabolic Indicators in DCG

| Variables              | 45 days-Baseline   |         | 90 days-Baseline    |         |
|------------------------|--------------------|---------|---------------------|---------|
|                        | Estimate (95%CI)   | P       | Estimate (95%CI)    | P       |
| Weight, kg             | -1.96(-2.81,-1.12) | <0.001* | -3.87(-5.19,-2.56)  | <0.001* |
| BMI, kg/m <sup>2</sup> | -0.66(-0.98,-0.35) | <0.001* | -1.25(-1.73,-0.76)  | <0.001* |
| BFP, %                 | -1.11(-1.46,-0.76) | <0.001* | -1.31(-1.9,-0.72)   | <0.001* |
| SBP, mmHg              | -3.35(-7.41,0.71)  | 0.104   | -4.65(-9.65,0.35)   | 0.068   |
| DBP, mmHg              | -1.58(-4.52,1.37)  | 0.289   | -2.82(-5.73,0.1)    | 0.058   |
| TC, mmol/L             | -0.08(-0.3,0.14)   | 0.458   | -0.04(-0.3,0.22)    | 0.755   |
| TG, mmol/L             | -0.34(-0.7,0.02)   | 0.062   | -0.31(-0.72,0.1)    | 0.133   |
| FBG, mmol/L            | -0.35(-0.71,0.02)  | 0.065   | -0.38(-0.86,0.1)    | 0.116   |
| ALT, U/L               | -4.20(-8.64,0.25)  | 0.064   | -7.34(-13.01,-1.68) | 0.012*  |

\*P<0.05

Table S5 Changes of Anthropometric and Metabolic Indicators in MRG(Adjust the baseline BMI)

| Variables              | 45 days-Baseline   |         | 95 days-Baseline    |         |
|------------------------|--------------------|---------|---------------------|---------|
|                        | Estimate (95%CI)   | P       | Estimate (95%CI)    | P       |
| Weight, kg             | -3.93(-4.74,-3.12) | <0.001* | -7.75(-9.01,-6.48)  | <0.001* |
| BMI, kg/m <sup>2</sup> | -1.28(-1.61,-0.95) | <0.001* | -2.59(-3.1,-2.09)   | <0.001* |
| BFP, %                 | -1.63(-1.96,-1.3)  | <0.001* | -3.71(-4.28,-3.14)  | <0.001* |
| SBP, mmHg              | -3.55(-7.3,0.21)   | 0.064   | -6.27(-10.73,-1.81) | 0.006*  |
| DBP, mmHg              | -2.07(-4.82,0.68)  | 0.139   | -3.59(-6.31,-0.88)  | 0.010*  |
| TC, mmol/L             | -0.32(-0.51,-0.13) | 0.001*  | -0.43(-0.64,-0.21)  | <0.001* |
| TG, mmol/L             | -0.48(-0.76,-0.21) | 0.001*  | -0.51(-0.82,-0.19)  | 0.002*  |
| FBG, mmol/L            | -0.46(-0.8,-0.12)  | 0.009*  | -0.48(-0.93,-0.03)  | 0.036*  |
| ALT, U/L               | -6.08(-10.06,-2.1) | 0.003*  | -7.17(-12.99,-1.35) | 0.016*  |

\*P<0.05

Table S6 Changes of Anthropometric and Metabolic Indicators in DCG (Adjust the baseline BMI)

| Variables              | 45 days-Baseline   |         | 95 days-Baseline    |         |
|------------------------|--------------------|---------|---------------------|---------|
|                        | Estimate (95%CI)   | P       | Estimate (95%CI)    | P       |
| Weight, kg             | -1.78(-2.66,-0.9)  | <0.001* | -3.49(-4.87,-2.12)  | <0.001* |
| BMI, kg/m <sup>2</sup> | -0.66(-1.02,-0.3)  | 0.001*  | -1.25(-1.8,-0.7)    | <0.001* |
| BFP, %                 | -1.09(-1.45,-0.73) | <0.001* | -1.34(-1.96,-0.71)  | <0.001* |
| SBP, mmHg              | -2.97(-7.18,1.24)  | 0.164   | -3.2(-8.2,1.8)      | 0.207   |
| DBP, mmHg              | -1.36(-4.4,1.68)   | 0.376   | -2.36(-5.36,0.64)   | 0.121   |
| TC, mmol/L             | -0.08(-0.3,0.14)   | 0.460   | -0.04(-0.3,0.21)    | 0.750   |
| TG, mmol/L             | -0.34(-0.65,-0.03) | 0.031*  | -0.31(-0.66,0.03)   | 0.075   |
| FBG, mmol/L            | -0.32(-0.7,0.06)   | 0.094   | -0.38(-0.88,0.11)   | 0.126   |
| ALT, U/L               | -4.82(-9.42,-0.22) | 0.040*  | -6.89(-11.95,-1.83) | 0.008*  |

\*P<0.05

Table S7 Difference in Anthropometric Indicators Improvement (Adjust the baseline BMI)

| Variables              | Time    | Estimate(95%CI)       | Forest Plot                                                                        | P       |
|------------------------|---------|-----------------------|------------------------------------------------------------------------------------|---------|
| Weight, kg             | 45 days | -2.15 (-3.35 , -0.96) | 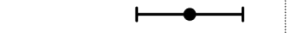 | <0.001* |
|                        | 90 days | -4.25 (-6.12 , -2.38) |  | <0.001* |
| BMI, kg/m <sup>2</sup> | 45 days | -0.62 (-1.10 , -0.13) |  | 0.015*  |
|                        | 90 days | -1.35 (-2.09 , -0.60) |  | <0.001* |
| BFP, %                 | 45 days | -0.54 (-1.03 , -0.05) |  | 0.030*  |
|                        | 90 days | -2.37 (-3.22 , -1.53) |  | <0.001* |

\*P<0.05

Table S8 Difference in Metabolic Indicators Improvement (Adjust the baseline BMI)

| Variables   | Time    | Estimate(95%CI)       | Forest Plot                                                                          | P      |
|-------------|---------|-----------------------|--------------------------------------------------------------------------------------|--------|
| SBP, mmHg   | 45 days | -0.57 (-6.21 , 5.06)  | 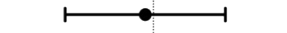   | 0.840  |
|             | 90 days | -3.07 (-9.78 , 3.63)  |    | 0.364  |
| DBP, mmHg   | 45 days | -0.71 (-4.81 , 3.40)  |    | 0.732  |
|             | 90 days | -1.23 (-5.28 , 2.82)  |   | 0.547  |
| ALT, U/L    | 45 days | -1.26 (-7.34 , 4.82)  |  | 0.681  |
|             | 90 days | 0.28 (-7.43 , 7.99)   |  | 0.943  |
| TC, mmol/L  | 45 days | -0.24 (-0.53 , 0.05)  |  | 0.110  |
|             | 90 days | -0.39 (-0.72 , -0.05) |  | 0.025* |
| TG, mmol/L  | 45 days | -0.14 (-0.56 , 0.27)  |  | 0.488  |
|             | 90 days | -0.19 (-0.66 , 0.28)  |  | 0.417  |
| FBG, mmol/L | 45 days | -0.14 (-0.65 , 0.37)  |  | 0.597  |
|             | 90 days | -0.09 (-0.76 , 0.57)  |  | 0.778  |

\*P<0.05
